# Supplementary material for: Targets of light signalling in Trichoderma reesei
Source: PubMed Central journal article supplement (PMC3831817; doi:10.1186/1471-2164-14-657), 2013-09-26
Supplement: 1471-2164-14-657-S2.pdf [file 1471-2164-14-657-S2.pdf]

## **Additional file 2**

**Figure S1** - Co-regulation of *cel6a/cbh2* (data obtained from microarrays) and *cel7a/cbh1* (data obtained from qPCR) in QM9414 and  $\Delta blr1$ ,  $\Delta blr2$ ,  $\Delta env1$ ,  $\Delta gnb1$ ,  $\Delta gng1$  and  $\Delta phlp1$ .

**Figure S2** – PCA analysis of replicate datasets of different mutants and conditions.

**Table S1** - Regulation of glycoside hydrolase genes in QM9414 and the deletion strains  $\Delta env1$ ,  $\Delta blr1$  and  $\Delta blr2$  and comparison with regulations in  $\Delta phlp1$ ,  $\Delta gnb1$  and  $\Delta gng1$ .

**Table S2** – Genes coregulated with *cbh2/cel6a* in QM9414 and  $\Delta blr1$ ,  $\Delta blr2$  and  $\Delta env1$ .

**Table S3** - Sequences of oligonucleotides used in this study.

### *Supplementary Figures*

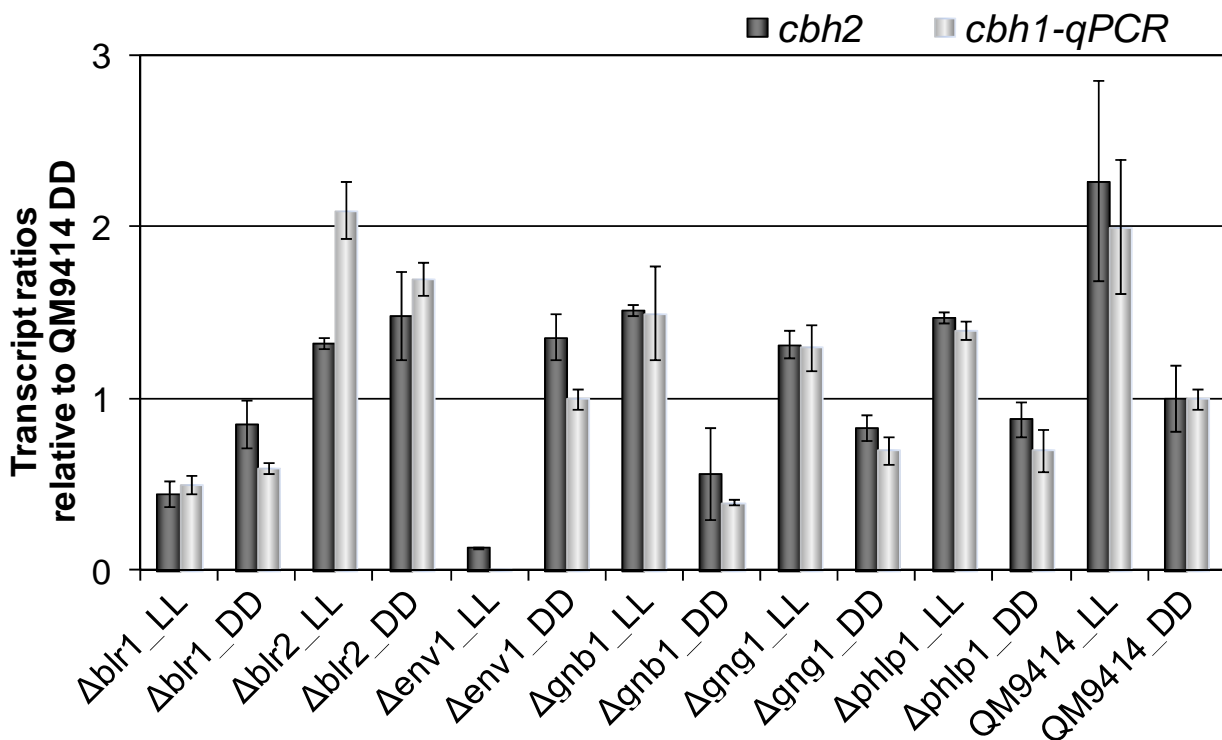

**Figure S1** - Co-regulation of *cel6a/cbh2* (data obtained from microarrays) and *cel7a/cbh1* (data obtained from qRT-PCR) in QM9414 and  $\Delta blr1$ ,  $\Delta blr2$ ,  $\Delta env1$ ,  $\Delta gnb1$ ,  $\Delta gng1$  and  $\Delta phlp1$ . Strains were grown on 1 % (w/v) microcrystalline cellulose as carbon source for 72 hours in constant light (LL) or darkness (DD).  $\Delta gnb1$ ,  $\Delta gng1$  and  $\Delta phlp1$  were included in the analysis as additional controls for coregulation of *cbh1* and *cbh2* in different strains.

**Supplementary Figure S2 – PCA analysis of replicate datasets of different mutants and conditions.**

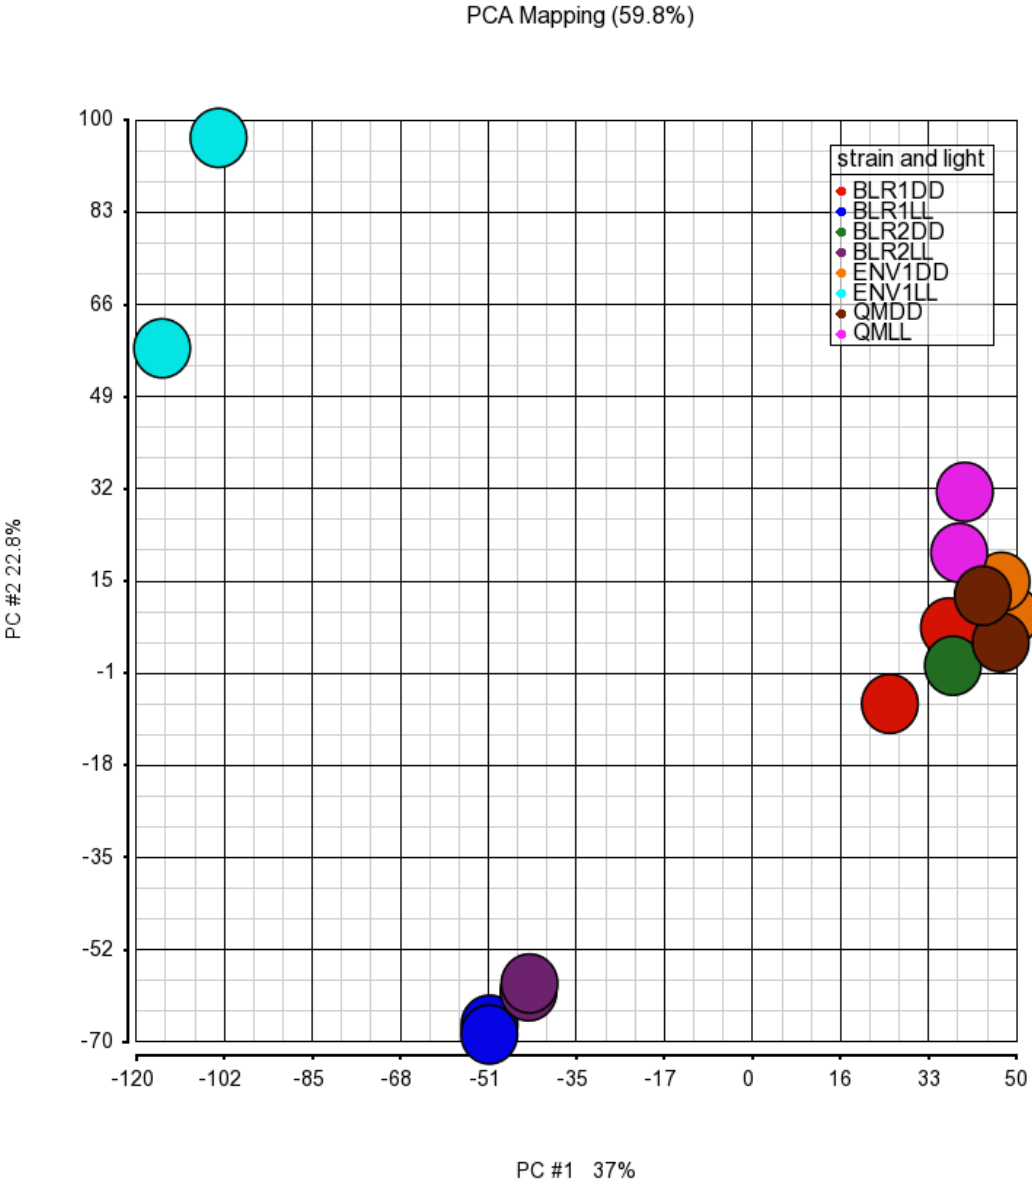









**Supplementary Table S2** List of genes coregulated with *cel6a/cbh2*.

| TRE       | Gene name  | Description                                                                                                                                                                 | Specification           | Group                                 | Topic                 |
|-----------|------------|-----------------------------------------------------------------------------------------------------------------------------------------------------------------------------|-------------------------|---------------------------------------|-----------------------|
| TR_72567  | cel6A;cbh2 | cellobiohydrolase CBH2                                                                                                                                                      | cellulolytic enzyme     | Glycoside Hydrolase Family 6 protein  | Glycoside hydrolases  |
| TR_102743 |            |                                                                                                                                                                             |                         |                                       |                       |
| TR_103041 |            |                                                                                                                                                                             |                         |                                       |                       |
| TR_103064 |            | Uncharacterized conserved protein                                                                                                                                           |                         |                                       |                       |
| TR_103555 |            |                                                                                                                                                                             |                         |                                       |                       |
| TR_105275 |            |                                                                                                                                                                             |                         |                                       |                       |
| TR_108477 |            | candidate oligo-1,6-glucosidase                                                                                                                                             |                         | Glycoside Hydrolase Family 13 protein | Glycoside hydrolases  |
| TR_112328 |            |                                                                                                                                                                             |                         |                                       |                       |
| TR_120120 |            |                                                                                                                                                                             |                         |                                       |                       |
| TR_120229 |            | candidate xylanase                                                                                                                                                          | hemicellulolytic enzyme | Glycoside Hydrolase Family 10 protein | Glycoside hydrolases  |
| TR_120311 |            | unique protein                                                                                                                                                              |                         |                                       |                       |
| TR_120312 | cel5A      | endo-1,4-glucanase EGL2                                                                                                                                                     | cellulolytic enzyme     | Glycoside Hydrolase Family 5 protein  | Glycoside hydrolases  |
| TR_120504 |            |                                                                                                                                                                             |                         |                                       |                       |
| TR_120877 |            |                                                                                                                                                                             |                         |                                       |                       |
| TR_120961 | cel61B     | endo-1,4-glucanase; CEL61B                                                                                                                                                  | cellulolytic enzyme     | Glycoside Hydrolase Family 61 protein | Glycoside hydrolases  |
| TR_121127 | bxl1       | b-xylosidase BXL1 (GenBank acc. No.CAA93248)                                                                                                                                |                         | Glycoside Hydrolase Family 3 protein  | Glycoside hydrolases  |
| TR_121189 |            |                                                                                                                                                                             |                         |                                       |                       |
| TR_121418 |            |                                                                                                                                                                             |                         |                                       |                       |
| TR_122208 | xyr1       | xylanase regulator 1                                                                                                                                                        |                         | cellulase transcription factor        | Transcription factors |
| TR_123473 |            | MFS, 12 TMs                                                                                                                                                                 |                         |                                       |                       |
| TR_123940 |            | CIP2                                                                                                                                                                        |                         |                                       |                       |
| TR_123992 |            | swollenin                                                                                                                                                                   |                         |                                       |                       |
| TR_23146  |            |                                                                                                                                                                             |                         |                                       |                       |
| TR_3739   |            | candidate b-xylosidase                                                                                                                                                      | hemicellulolytic enzyme | Glycoside Hydrolase Family 43 protein | Glycoside hydrolases  |
| TR_49081  |            | candidate xyloglucanase; EGL6 (CEL74A)                                                                                                                                      | hemicellulolytic enzyme | Glycoside Hydrolase Family 74 protein | Glycoside hydrolases  |
| TR_52438  |            |                                                                                                                                                                             |                         |                                       |                       |
| TR_53238  |            | TRE456, hypothetical G-protein coupled receptor, family 2, secretin like, related to Magnaporthe grisea MG00532 (GPCR with homology to rat growth hormone releasing factor) |                         | G-proteins                            | signal transduction   |
| TR_53331  |            |                                                                                                                                                                             |                         |                                       |                       |
| TR_53722  |            |                                                                                                                                                                             |                         |                                       |                       |
| TR_54086  |            |                                                                                                                                                                             |                         |                                       |                       |
| TR_54219  |            |                                                                                                                                                                             |                         |                                       |                       |

| TRE      | Gene name | Description                                                                                                                                                                                                            | Specification                                                     | Group                                   | Topic                 |
|----------|-----------|------------------------------------------------------------------------------------------------------------------------------------------------------------------------------------------------------------------------|-------------------------------------------------------------------|-----------------------------------------|-----------------------|
| TR_55999 |           | candidate a-galactosidase                                                                                                                                                                                              |                                                                   | Glycoside Hydrolase Family 27 protein   | Glycoside hydrolases  |
| TR_56684 |           | hypothetical sugar transporter family protein                                                                                                                                                                          |                                                                   |                                         | Transport             |
| TR_61763 |           |                                                                                                                                                                                                                        |                                                                   |                                         |                       |
| TR_63001 |           |                                                                                                                                                                                                                        |                                                                   |                                         |                       |
| TR_69276 |           | candidate b-glycosidase distantly related to xylanase                                                                                                                                                                  |                                                                   | Glycoside Hydrolase Family 5 protein    | Glycoside hydrolases  |
| TR_69316 |           | unknown conserved protein                                                                                                                                                                                              |                                                                   |                                         |                       |
| TR_69375 |           | unknown hypothetical protein                                                                                                                                                                                           |                                                                   |                                         |                       |
| TR_69944 |           | candidate a-xylosidase                                                                                                                                                                                                 |                                                                   | Glycoside Hydrolase Family 31 protein   | Glycoside hydrolases  |
| TR_70098 |           | Amino acid transporters                                                                                                                                                                                                |                                                                   |                                         |                       |
| TR_70520 |           |                                                                                                                                                                                                                        |                                                                   |                                         |                       |
| TR_72526 |           | candidate a-glucuronidase GLR1 (GenBank acc.no. CAA92949)                                                                                                                                                              | hemicellulolytic enzyme                                           | Glycoside Hydrolase Family 67 protein   | Glycoside hydrolases  |
| TR_73632 |           | AXE1                                                                                                                                                                                                                   |                                                                   |                                         |                       |
| TR_73638 |           | CIP1                                                                                                                                                                                                                   |                                                                   |                                         |                       |
| TR_73654 |           | The basic-leucine zipper (bZIP) transcription factors are proteins that contain a basic region mediating sequence-specific DNA-binding followed by a leucine zipper region (see IPR002158 ) required for dimerization. | basic-leucine zipper domain-containing/DNA binding domain protein |                                         | Transcription factors |
| TR_76215 |           | Sulfide dehydrogenase                                                                                                                                                                                                  |                                                                   | Additional aspects of sulfur metabolism | Sulfur metabolism     |
| TR_76696 |           | Flavin-containing monooxygenase                                                                                                                                                                                        |                                                                   |                                         |                       |
| TR_76722 |           | flavo-hemoglobin                                                                                                                                                                                                       |                                                                   |                                         |                       |
| TR_77154 |           | RfeB is an A. nidulans DNA-binding Homeobox Nuclear protein                                                                                                                                                            | transcription factor-like protein                                 |                                         | Transcription factors |
| TR_77481 |           | D-xylulose 5-phosphate/D-fructose 6-phosphate phosphoketolase                                                                                                                                                          |                                                                   |                                         |                       |
| TR_80240 | bga1      | b-galactosidase (GenBank acc. No. CAD70669) (EC 3.2.1.23)                                                                                                                                                              |                                                                   | Glycoside Hydrolase Family 35 protein   | Glycoside hydrolases  |
| TR_81148 |           |                                                                                                                                                                                                                        |                                                                   |                                         |                       |



**Supplementary Table S3 - Sequences of oligonucleotides used in this study.**

| <b>fragment</b> | <b>oligonucleotide</b> | <b>study</b>                | <b>sequence</b>              |
|-----------------|------------------------|-----------------------------|------------------------------|
| <i>cbh1</i>     | RTcbh1F                | Tisch <i>et al.</i> , 2011a | 5' ACCGTTGTCACCCAGTTCG 3'    |
|                 | RTcbh1R                | Tisch <i>et al.</i> , 2011a | 5' ATCGTTGAGCTCGTTGCCAG 3'   |
| <i>rpl6e</i>    | RTL6eF1                | Tisch <i>et al.</i> , 2011a | 5' GATACGTCA TCGCCACCTCC 3'  |
|                 | RTL6eR1                | Tisch <i>et al.</i> , 2011a | 5' CTTCTCCTTGGCCTTCTCG 3'    |
| <i>xy11</i>     | RT_xy11_fw1            | This study                  | 5' CATCTACGCCCCGATCAAGC 3'   |
|                 | RT_xy11_rev1           | This study                  | 5' CAAAGGACGAGTAGGCGGTGAC 3' |
| <i>lad1</i>     | RT_lad1_fw1            | This study                  | 5' CTTGCCCCGCTTGTCATCAC 3'   |
|                 | RT_lad1_rev1           | This study                  | 5' CCGTTTCCTCAGCCGACTTG 3'   |
| <i>xdh1</i>     | RT_xdh1_fw1            | This study                  | 5' CTCCACCATTGTCAGCGTC 3'    |
|                 | RT_xdh1_rev1           | This study                  | 5' CCTTTGCGTTGTCCTCAGC 3'    |
| <i>lxr3</i>     | RT_lxr3_fw1            | This study                  | 5' AGGAGGGCACGACGATTGAC 3'   |
|                 | RT_lxr3_rev1           | This study                  | 5' GCCTTGGAGCTGTTGTACACG 3'  |
| <i>lxr4</i>     | RT_lxr4_fw1            | This study                  | 5' GGCAAGAAGTTCCAGGTTCG 3'   |
|                 | RT_lxr4_rev1           | This study                  | 5' CAGCACGTTGATGGCGTAG 3'    |
| <i>xki1</i>     | RT_xki1_fw1            | This study                  | 5' TGTCAGATCACGCCCTTCAC 3'   |
|                 | RT_xki1_rev1           | This study                  | 5' GGTGAAGAAGTGGTACGAGC 3'   |
